# Supplementary material for: Germany’s fourth COVID-19 wave was mainly driven by the unvaccinated
Source: Springer Nature journal article supplement (doi:10.1038/s43856-022-00176-7), 2022-09-16
Supplement: MOESM1 [file 43856_2022_176_MOESM1_ESM.pdf]

## **Description of Additional Supplementary Files**

**File Name:** Supplementary Data 1

**Description:** Data to reproduce the figures
